# Supplementary material for: Non-covalent interaction, adsorption characteristics and solvent effect of procainamide anti-arrhythmias drug on silver and gold loaded silica surfaces: SERS spectroscopy, density functional theory and molecular docking investigations
Source: Royal Society of Chemistry journal article supplement (doi:10.1039/d3ra00514c), 2023-01-01
Supplement: d3ra00514c1.pdf [file d3ra00514c1.pdf]

# **Non-covalent interaction, adsorption characteristics and solvent effect of procainamide anti-arrhythmias drug on silver and gold loaded silica surfaces: SERS spectroscopy, density functional theory and molecular docking investigations**

**V. Vetrivelan<sup>a</sup>, Sakthivel S<sup>b</sup>, S. Muthu<sup>c\*</sup>, Abdulaziz A. Al-Saadi<sup>d\*</sup>**

*<sup>a</sup>Department of Physics, Thanthai Periyar Government Institute of Technology, Vellore 632002, India.*

*<sup>b</sup>Department of Physics, Panimalar Engineering college, Chennai-600 123, Tamilnadu, India*

*<sup>c</sup>Department of Physics, Arignar Anna Govt. Arts College, Cheyyar 604 407, Tamilnadu, India.*

*<sup>d</sup>Department of Chemistry, King Fahd University of Petroleum & Minerals, Dhahran 31261, Saudi Arabia.*

*Corresponding author Emails: [mutge@gmail.com](mailto:mutge@gmail.com) (S. Muthu); [asaadi.kfupm@gmail.com](mailto:asaadi.kfupm@gmail.com) (A. A. Al-Saadi),*

**Table S1.** Mulliken charges of PA and PA+Ag/Au-SiO<sub>2</sub> in gaseous & water phase computed at the B3LYP/LANL2DZ level.

| Atom | PA      |         | PA complexes with Ag-SiO <sub>2</sub> |         |           |         |           |        | PA complexes with Au-SiO <sub>2</sub> |         |           |         |           |         |
|------|---------|---------|---------------------------------------|---------|-----------|---------|-----------|--------|---------------------------------------|---------|-----------|---------|-----------|---------|
|      | Gas     | Water   | Complex 1                             |         | Complex 2 |         | Complex 3 |        | Complex 1                             |         | Complex 2 |         | Complex 3 |         |
|      |         |         | Gas                                   | Water   | Gas       | Water   | Gas       | Water  | Gas                                   | Water   | Gas       | Water   | Gas       | Water   |
| O1   | -0.2876 | -0.3521 | -0.3142                               | -0.3765 | -0.4181   | -0.4353 | -0.420    | -0.441 | -0.3104                               | -0.3766 | -0.4225   | -0.4447 | -0.2336   | -0.2807 |
| N2   | -0.0661 | -0.0961 | -0.1214                               | -0.1385 | -0.1300   | -0.1491 | -0.126    | -0.149 | -0.1309                               | -0.1504 | -0.1227   | -0.1375 | -0.1440   | -0.1574 |
| N3   | -0.4138 | -0.4136 | -0.3852                               | -0.3853 | -0.3757   | -0.3756 | -0.369    | -0.372 | -0.3912                               | -0.3903 | -0.3769   | -0.3747 | -0.6121   | -0.6201 |
| N4   | -0.7103 | -0.7217 | -0.7633                               | -0.7575 | -0.6876   | -0.6970 | -0.688    | -0.695 | -0.8267                               | -0.8222 | -0.6878   | -0.6947 | -0.6835   | -0.6868 |
| C5   | -0.2666 | -0.2755 | -0.3128                               | -0.3141 | -0.2993   | -0.3036 | -0.290    | -0.296 | -0.2985                               | -0.3034 | -0.3096   | -0.3116 | -0.2924   | -0.2890 |
| C6   | -0.2767 | -0.2824 | -0.2838                               | -0.2879 | -0.2867   | -0.2888 | -0.290    | -0.291 | -0.2849                               | -0.2873 | -0.2899   | -0.2911 | -0.2931   | -0.2954 |
| C7   | -0.2645 | -0.2723 | -0.2820                               | -0.2861 | -0.2800   | -0.2835 | -0.275    | -0.279 | -0.2788                               | -0.2833 | -0.2817   | -0.2850 | -0.2921   | -0.2910 |
| C8   | -0.3926 | -0.3902 | -0.3496                               | -0.3470 | -0.3575   | -0.3533 | -0.360    | -0.351 | -0.3528                               | -0.3496 | -0.3593   | -0.3524 | -0.3106   | -0.2995 |
| C9   | -0.6877 | -0.6945 | -0.6503                               | -0.6577 | -0.6268   | -0.6382 | -0.611    | -0.626 | -0.6295                               | -0.6394 | -0.6368   | -0.6478 | -0.6233   | -0.6320 |
| C10  | -0.6912 | -0.6959 | -0.6262                               | -0.6391 | -0.6259   | -0.6405 | -0.620    | -0.637 | -0.6264                               | -0.6402 | -0.6254   | -0.6390 | -0.6297   | -0.6421 |
| C11  | 0.1438  | 0.1392  | 0.1700                                | 0.1620  | 0.2920    | 0.2873  | 0.297     | 0.288  | 0.1764                                | 0.1727  | 0.3245    | 0.3269  | 0.1921    | 0.2045  |
| C12  | 0.3541  | 0.3502  | 0.3032                                | 0.2990  | 0.2936    | 0.2810  | 0.301     | 0.291  | 0.3066                                | 0.3060  | 0.3092    | 0.2965  | 0.3238    | 0.3241  |
| C13  | -0.3646 | -0.3922 | -0.3413                               | -0.3662 | -0.2998   | -0.3048 | -0.297    | -0.322 | -0.3413                               | -0.3632 | -0.2556   | -0.2721 | -0.3218   | -0.3403 |
| C14  | -0.3726 | -0.3788 | -0.3442                               | -0.3515 | -0.3537   | -0.3536 | -0.309    | -0.317 | -0.3333                               | -0.3381 | -0.3514   | -0.3517 | -0.2505   | -0.2567 |
| C15  | -0.4052 | -0.4247 | -0.3557                               | -0.3709 | -0.4230   | -0.4359 | -0.406    | -0.426 | -0.3477                               | -0.3590 | -0.4226   | -0.4421 | -0.4019   | -0.4194 |
| C16  | -0.4269 | -0.4454 | -0.3410                               | -0.3502 | -0.4115   | -0.4297 | -0.421    | -0.439 | -0.3490                               | -0.3548 | -0.4120   | -0.4290 | -0.4427   | -0.4582 |
| C17  | 0.5099  | 0.4687  | 0.4429                                | 0.4350  | 0.4914    | 0.4488  | 0.500     | 0.459  | 0.4483                                | 0.4394  | 0.4994    | 0.4591  | 0.4956    | 0.4596  |
| H18  | 0.1444  | 0.1729  | 0.1816                                | 0.2012  | 0.1780    | 0.1976  | 0.176     | 0.198  | 0.1743                                | 0.1948  | 0.1845    | 0.2073  | 0.2427    | 0.2344  |
| H19  | 0.2476  | 0.2307  | 0.2317                                | 0.2204  | 0.2306    | 0.2230  | 0.222     | 0.217  | 0.2346                                | 0.2205  | 0.2357    | 0.2223  | 0.2388    | 0.2307  |
| H20  | 0.2081  | 0.2138  | 0.1866                                | 0.1950  | 0.1888    | 0.1963  | 0.194     | 0.197  | 0.1859                                | 0.1955  | 0.1883    | 0.1968  | 0.1871    | 0.1978  |
| H21  | 0.1573  | 0.1726  | 0.1689                                | 0.1740  | 0.1756    | 0.1820  | 0.170     | 0.182  | 0.1734                                | 0.1800  | 0.1825    | 0.1794  | 0.1874    | 0.1856  |
| H22  | 0.1975  | 0.2055  | 0.1836                                | 0.1992  | 0.1797    | 0.1979  | 0.175     | 0.197  | 0.1785                                | 0.1972  | 0.1807    | 0.1998  | 0.2043    | 0.2041  |
| H23  | 0.1565  | 0.1736  | 0.1692                                | 0.1728  | 0.1766    | 0.1813  | 0.177     | 0.183  | 0.1754                                | 0.1806  | 0.1738    | 0.1750  | 0.1800    | 0.1839  |
| H24  | 0.2485  | 0.2221  | 0.2526                                | 0.2334  | 0.2537    | 0.2325  | 0.254     | 0.238  | 0.2506                                | 0.2254  | 0.2622    | 0.2444  | 0.2353    | 0.2441  |
| H25  | 0.1998  | 0.2276  | 0.2063                                | 0.2203  | 0.2042    | 0.2227  | 0.214     | 0.229  | 0.1984                                | 0.2192  | 0.2113    | 0.2273  | 0.2380    | 0.2399  |
| H26  | 0.2052  | 0.2124  | 0.2389                                | 0.2240  | 0.2109    | 0.2091  | 0.191     | 0.209  | 0.2164                                | 0.2045  | 0.2287    | 0.2228  | 0.2144    | 0.2090  |
| H27  | 0.2240  | 0.2069  | 0.2003                                | 0.1984  | 0.2118    | 0.2046  | 0.241     | 0.213  | 0.2076                                | 0.2028  | 0.1997    | 0.2016  | 0.2038    | 0.2046  |
| H28  | 0.1962  | 0.2075  | 0.1878                                | 0.1957  | 0.1930    | 0.1992  | 0.197     | 0.199  | 0.1878                                | 0.1976  | 0.2010    | 0.1987  | 0.1969    | 0.2005  |
| H29  | 0.2040  | 0.2120  | 0.1967                                | 0.2014  | 0.1974    | 0.2013  | 0.201     | 0.202  | 0.1971                                | 0.2009  | 0.1997    | 0.2021  | 0.1959    | 0.2017  |
| H30  | 0.2206  | 0.2073  | 0.2082                                | 0.2017  | 0.2105    | 0.2037  | 0.219     | 0.206  | 0.2097                                | 0.2033  | 0.2072    | 0.2025  | 0.2054    | 0.2037  |
| H31  | 0.1942  | 0.2046  | 0.1909                                | 0.1992  | 0.1914    | 0.1994  | 0.189     | 0.200  | 0.1894                                | 0.1987  | 0.1919    | 0.2002  | 0.1926    | 0.2001  |
| H32  | 0.2982  | 0.3377  | 0.3003                                | 0.3383  | 0.3190    | 0.3508  | 0.310     | 0.344  | 0.2989                                | 0.3404  | 0.3226    | 0.3595  | 0.3526    | 0.3892  |
| H33  | 0.2649  | 0.2676  | 0.2807                                | 0.2733  | 0.2494    | 0.2554  | 0.262     | 0.263  | 0.2847                                | 0.2772  | 0.2573    | 0.2587  | 0.2700    | 0.2696  |
| H34  | 0.2172  | 0.2468  | 0.2287                                | 0.2505  | 0.2219    | 0.2519  | 0.196     | 0.229  | 0.2190                                | 0.2453  | 0.2266    | 0.2543  | 0.2200    | 0.2375  |
| H35  | 0.2182  | 0.2487  | 0.2303                                | 0.2556  | 0.3052    | 0.2860  | 0.225     | 0.250  | 0.2333                                | 0.2592  | 0.2297    | 0.2531  | 0.2248    | 0.2532  |
| H36  | 0.2142  | 0.2485  | 0.2333                                | 0.2582  | 0.2178    | 0.2490  | 0.220     | 0.251  | 0.2375                                | 0.2625  | 0.2223    | 0.2526  | 0.2262    | 0.2543  |
| H37  | 0.3002  | 0.3294  | 0.3474                                | 0.3663  | 0.3077    | 0.3370  | 0.314     | 0.340  | 0.3697                                | 0.3964  | 0.3143    | 0.3408  | 0.3190    | 0.3453  |
| H38  | 0.3021  | 0.3292  | 0.3528                                | 0.3748  | 0.3284    | 0.3393  | 0.316     | 0.339  | 0.3722                                | 0.3996  | 0.3189    | 0.3413  | 0.3179    | 0.3444  |
| Si39 |         |         | 0.7903                                | 0.7446  | 0.7465    | 0.7073  | 0.788     | 0.747  | 0.9523                                | 0.9390  | 0.9498    | 0.9394  | 0.9492    | 0.9415  |
| O40  |         |         | -0.9598                               | -0.9691 | -0.9395   | -0.9567 | -0.963    | -0.972 | -0.8554                               | -0.9161 | -0.9623   | -0.9711 | -0.9643   | -0.9743 |
| O41  |         |         | -0.8598                               | -0.9385 | -0.8940   | -0.9315 | -0.863    | -0.938 | -0.9635                               | -0.9745 | -0.8588   | -0.9147 | -0.8560   | -0.9142 |
| Si42 |         |         | 0.7921                                | 0.7442  | 0.7482    | 0.7139  | 0.791     | 0.750  | 0.9497                                | 0.9383  | 0.9420    | 0.9365  | 0.9551    | 0.9433  |
| Ag43 |         |         | -0.4413                               | -0.3333 | -0.3359   | -0.2557 | -0.465    | -0.359 |                                       |         |           |         |           |         |
| Ag44 |         |         | 0.4567                                | 0.5308  | 0.4218    | 0.4748  | 0.434     | 0.488  |                                       |         |           |         |           |         |
| Au43 |         |         |                                       |         |           |         |           |        | 0.4398                                | 0.4687  | 0.3522    | 0.3639  | 0.3544    | 0.3876  |
| Au44 |         |         |                                       |         |           |         |           |        | -0.7471                               | -0.7170 | -0.7407   | -0.7036 | -0.7715   | -0.7373 |

**Table S2.** Chemical descriptors of PA and PA $\cdots$ Ag- and Au-SiO<sub>2</sub> in gaseous and water phases computed at B3LYP/LANL2DZ.

| Atom                               | PA    |       | Ag-SiO <sub>2</sub> | Au-SiO <sub>2</sub> | PA $\cdots$ Ag-SiO <sub>2</sub> |       |           |       |           |       | PA $\cdots$ Au-SiO <sub>2</sub> |       |           |       |           |       |
|------------------------------------|-------|-------|---------------------|---------------------|---------------------------------|-------|-----------|-------|-----------|-------|---------------------------------|-------|-----------|-------|-----------|-------|
|                                    |       |       |                     |                     | Complex 1                       |       | Complex 2 |       | Complex 3 |       | Complex 1                       |       | Complex 2 |       | Complex 3 |       |
|                                    | Gas   | Water |                     |                     | Gas                             | Water | Gas       | Water | Gas       | Water | Gas                             | Water | Gas       | Water | Gas       | Water |
| <b>E<sub>HOMO</sub> (eV)</b>       | -5.53 | -5.73 | -5.23               | -6.37               | -4.39                           | -4.65 | -4.31     | -4.69 | -4.05     | -4.64 | -5.47                           | -5.43 | -5.17     | -5.46 | -5.39     | -5.59 |
| <b>E<sub>LUMO</sub> (eV)</b>       | -0.43 | -0.68 | -3.69               | -4.83               | -2.07                           | -1.85 | -1.63     | -1.75 | -2.00     | -1.84 | -2.16                           | -2.18 | -2.02     | -2.18 | -2.42     | -2.10 |
| <b>E<sub>g</sub> (eV)</b>          | 5.10  | 5.05  | 1.54                | 1.54                | 2.32                            | 2.81  | 2.68      | 2.94  | 2.05      | 2.79  | 3.32                            | 3.26  | 3.16      | 3.29  | 2.98      | 3.35  |
| <b>Fermi level (eV)</b>            | -2.98 | -3.20 | -4.46               | -5.60               | -3.23                           | -3.25 | -2.97     | -3.22 | -3.03     | -3.24 | -3.81                           | -3.81 | -3.59     | -3.82 | -3.91     | -3.89 |
| <b>Chemical Potential (eV)</b>     | -2.98 | -3.20 | -4.46               | -5.60               | -3.23                           | -3.25 | -2.97     | -3.22 | -3.03     | -3.24 | -3.81                           | -3.81 | -3.59     | -3.82 | -3.91     | -3.89 |
| <b>Hardness (eV)</b>               | 2.55  | 2.52  | 0.77                | 0.77                | 1.16                            | 1.40  | 1.34      | 1.47  | 1.03      | 1.39  | 1.66                            | 1.63  | 1.58      | 1.64  | 1.49      | 1.68  |
| <b>Softness (1/eV)</b>             | 0.392 | 0.39  | 1.30                | 1.30                | 0.86                            | 0.71  | 0.75      | 0.68  | 0.97      | 0.72  | 0.60                            | 0.61  | 0.63      | 0.61  | 0.67      | 0.59  |
| <b>Electronegativity</b>           | 2.981 | 3.203 | 4.460               | 5.601               | 3.233                           | 3.251 | 2.974     | 3.221 | 3.027     | 3.242 | 3.815                           | 3.807 | 3.595     | 3.820 | 3.906     | 3.89  |
| <b>Electrophilicity index (eV)</b> | 1.740 | 2.032 | 12.93               | 20.39               | 4.506                           | 3.767 | 3.303     | 3.524 | 4.468     | 3.760 | 4.389                           | 4.451 | 4.095     | 4.440 | 5.121     | 4.451 |
| <b>Dipole moment (Debye)</b>       | 5.67  | 7.88  | 4.11                | 3.77                | 10.66                           | 11.21 | 12.02     | 12.41 | 18.91     | 22.65 | 12.71                           | 14.99 | 16.19     | 19.19 | 13.37     | 15.65 |

**Table S3.** Predicted wavelengths, energies, oscillator strengths, symmetry, and major contributing molecular orbitals of PA...Ag/Au-SiO<sub>2</sub> complexes in comparison with PA in different solvent phase as calculated at the B3LYP/LANL2DZ level of theory.

| Compound                                    | Position                                             | Solvent    | $\lambda$<br>(nm) | Energy<br>(cm <sup>-1</sup> ) | Oscillator<br>strength | Symmetry  | Major contributions                               |
|---------------------------------------------|------------------------------------------------------|------------|-------------------|-------------------------------|------------------------|-----------|---------------------------------------------------|
| PA complexes<br>with<br>Ag-SiO <sub>2</sub> | Complex 1<br>-H <sub>2</sub> N-Ag...SiO <sub>2</sub> | Water      | 561               | 17826                         | 0.1403                 | Singlet-A | HOMO->LUMO (98%)                                  |
|                                             |                                                      |            | 481               | 20798                         | 0.0165                 | Singlet-A | HOMO->L+1 (25%), HOMO->L+2 (66%)                  |
|                                             |                                                      |            | 388               | 25786                         | 0.3431                 | Singlet-A | HOMO->L+3 (89%), H-2->LUMO (3%)                   |
|                                             |                                                      | DMSO       | 565               | 17688                         | 0.1476                 | Singlet-A | HOMO->LUMO (98%)                                  |
|                                             |                                                      |            | 482               | 20735                         | 0.0176                 | Singlet-A | HOMO->L+1 (25%), HOMO->L+2 (66%)                  |
|                                             |                                                      |            | 392               | 25494                         | 0.3665                 | Singlet-A | HOMO->L+3 (89%), H-2->LUMO (2%)                   |
|                                             |                                                      | Methanol   | 559               | 17886                         | 0.1401                 | Singlet-A | HOMO->LUMO (98%)                                  |
|                                             |                                                      |            | 481               | 20798                         | 0.0168                 | Singlet-A | HOMO->L+1 (25%), HOMO->L+2 (64%)                  |
|                                             |                                                      |            | 390               | 25670                         | 0.3452                 | Singlet-A | HOMO->L+3 (88%), H-2->LUMO (3%)                   |
|                                             |                                                      | Chloroform | 554               | 18044                         | 0.1518                 | Singlet-A | HOMO->LUMO (98%)                                  |
|                                             |                                                      |            | 488               | 20491                         | 0.0234                 | Singlet-A | HOMO->L+1 (28%), HOMO->L+2 (36%), HOMO->L+3 (23%) |
|                                             |                                                      |            | 411               | 24307                         | 0.3956                 | Singlet-A | HOMO->L+2 (38%), HOMO->L+3 (50%)                  |
|                                             | Complex 2<br>-O-Ag...SiO <sub>2</sub>                | Water      | 536               | 18661                         | 0.1309                 | Singlet-A | HOMO->LUMO (96%)                                  |
|                                             |                                                      |            | 468               | 21370                         | 0.0192                 | Singlet-A | HOMO->L+1 (31%), HOMO-                            |

|  |                                               |                   |       |        |           |           |                                  |
|--|-----------------------------------------------|-------------------|-------|--------|-----------|-----------|----------------------------------|
|  |                                               |                   |       |        |           |           | >L+2 (51%)                       |
|  |                                               | 381               | 26274 | 0.3891 | Singlet-A |           | HOMO->L+3 (83%) H-3->LUMO (5%)   |
|  | <b>DMSO</b>                                   | 540               | 18523 | 0.1382 | Singlet-A |           | HOMO->LUMO (96%)                 |
|  |                                               | 469               | 21330 | 0.0206 | Singlet-A |           | HOMO->L+1 (29%), HOMO->L+2 (52%) |
|  |                                               | 385               | 26007 | 0.4158 | Singlet-A |           | HOMO->L+3 (84%) H-3->LUMO (4%)   |
|  |                                               | 535               | 18690 | 0.1305 | Singlet-A |           | HOMO->LUMO (96%)                 |
|  | <b>Methanol</b>                               | 467               | 21411 | 0.0196 | Singlet-A |           | HOMO->L+1 (28%), HOMO->L+2 (52%) |
|  |                                               | 382               | 26160 | 0.3923 | Singlet-A |           | HOMO->L+3 (82%) H-3->LUMO (5%)   |
|  |                                               | 536               | 18641 | 0.1393 | Singlet-A |           | HOMO->LUMO (94%)                 |
|  | <b>Chloroform</b>                             | 464               | 21566 | 0.0283 | Singlet-A |           | HOMO->L+1 (17%), HOMO->L+2 (46%) |
|  |                                               | 403               | 24813 | 0.4537 | Singlet-A |           | HOMO->L+2 (23%), HOMO->L+3 (68%) |
|  |                                               | 563               | 17748 | 0.1349 | Singlet-A |           | HOMO->LUMO (98%)                 |
|  | <b>Complex 3<br/>-HN-Ag...SiO<sub>2</sub></b> | <b>Water</b>      | 482   | 20766  | 0.0195    | Singlet-A | HOMO->L+2 (86%) HOMO->L+1 (7%)   |
|  |                                               |                   | 392   | 25523  | 0.3357    | Singlet-A | HOMO->L+3 (89%) H-3->LUMO (3%)   |
|  |                                               |                   | 568   | 17610  | 0.1421    | Singlet-A | HOMO->LUMO (98%)                 |
|  |                                               | <b>DMSO</b>       | 483   | 20717  | 0.0206    | Singlet-A | HOMO->L+2 (86%) HOMO->L+1 (7%)   |
|  |                                               |                   | 396   | 25233  | 0.3598    | Singlet-A | HOMO->L+3 (90%) H-3->LUMO (2%)   |
|  |                                               |                   | 562   | 17796  | 0.1347    | Singlet-A | HOMO->LUMO (98%)                 |
|  |                                               | <b>Methanol</b>   | 481   | 20785  | 0.0197    | Singlet-A | HOMO->L+2 (86%) HOMO->L+1 (7%)   |
|  |                                               |                   | 394   | 25410  | 0.3379    | Singlet-A | HOMO->L+3 (89%) H-3->LUMO (3%)   |
|  |                                               | <b>Chloroform</b> | 559   | 17881  | 0.1455    | Singlet-A | HOMO->LUMO (63%)                 |

|                                             |                                                       |                 |       |        |           |                                                   |                                                   |
|---------------------------------------------|-------------------------------------------------------|-----------------|-------|--------|-----------|---------------------------------------------------|---------------------------------------------------|
|                                             |                                                       |                 | 483   | 20724  | 0.0234    | Singlet-A                                         | HOMO->L+3 (85%) HOMO->L+1 (4%)                    |
|                                             |                                                       |                 | 417   | 23990  | 0.3924    | Singlet-A                                         | HOMO->L+2 (92%)                                   |
| <b>PA complexes with Au-SiO<sub>2</sub></b> | <b>Complex 1 -H<sub>2</sub>N-Au...SiO<sub>2</sub></b> | <b>Water</b>    | 397   | 25205  | 0.142     | Singlet-A                                         | HOMO->LUMO (96%)                                  |
|                                             |                                                       |                 | 330   | 30280  | 0.022     | Singlet-A                                         | H-2->LUMO (20%), HOMO->L+1 (17%)                  |
|                                             |                                                       |                 | 326   | 30721  | 0.0184    | Singlet-A                                         | H-2->LUMO (34%), HOMO->L+3 (43%)                  |
|                                             |                                                       | <b>DMSO</b>     | 399   | 25083  | 0.151     | Singlet-A                                         | HOMO->LUMO (96%)                                  |
|                                             |                                                       |                 | 331   | 30218  | 0.0259    | Singlet-A                                         | H-2->LUMO (20%), HOMO->L+1 (17%)                  |
|                                             |                                                       |                 | 326   | 30649  | 0.0235    | Singlet-A                                         | H-2->LUMO (32%), HOMO->L+2 (11%)                  |
|                                             |                                                       | <b>Methanol</b> | 396   | 25231  | 0.1414    | Singlet-A                                         | HOMO->LUMO (96%)                                  |
|                                             |                                                       |                 | 330   | 30280  | 0.0236    | Singlet-A                                         | H-2->LUMO (23%), HOMO->L+1 (15%)                  |
|                                             |                                                       |                 | 326   | 30702  | 0.0197    | Singlet-A                                         | H-2->LUMO (30%), HOMO->L+1 (10%)                  |
|                                             | <b>Chloroform</b>                                     | 397             | 25173 | 0.1531 | Singlet-A | HOMO->LUMO (96%)                                  |                                                   |
|                                             |                                                       | 333             | 30043 | 0.0622 | Singlet-A | H-2->LUMO (31%), HOMO->L+2 (43%), HOMO->L+3 (16%) |                                                   |
|                                             |                                                       | 328             | 30443 | 0.031  | Singlet-A | HOMO->L+1 (14%), HOMO->L+2 (12%), HOMO->L+3 (58%) |                                                   |
|                                             | <b>Complex 2 -O-Au...SiO<sub>2</sub></b>              | <b>Water</b>    | 396   | 25235  | 0.1381    | Singlet-A                                         | HOMO->LUMO (96%)                                  |
|                                             |                                                       |                 | 332   | 30127  | 0.0185    | Singlet-A                                         | H-3->LUMO (13%), HOMO->L+1 (11%), HOMO->L+2 (70%) |
|                                             |                                                       |                 | 326   | 30632  | 0.0234    | Singlet-A                                         | H-3->LUMO (40%), HOMO->L+3 (50%)                  |
|                                             |                                                       | <b>DMSO</b>     | 398   | 25109  | 0.147     | Singlet-A                                         | HOMO->LUMO (96%)                                  |
|                                             |                                                       |                 | 333   | 30067  | 0.0216    | Singlet-A                                         | H-3->LUMO (13%), HOMO->L+1 (10%), HOMO->L+2 (70%) |
|                                             |                                                       |                 | 327   | 30559  | 0.0297    | Singlet-A                                         | H-3->LUMO (37%), HOMO->L+3 (53%)                  |
| <b>Methanol</b>                             |                                                       | 396             | 25251 | 0.1375 | Singlet-A | HOMO->LUMO (96%)                                  |                                                   |

|  |  |                                               |                   |            |              |           |                                  |                                                   |           |                                   |
|--|--|-----------------------------------------------|-------------------|------------|--------------|-----------|----------------------------------|---------------------------------------------------|-----------|-----------------------------------|
|  |  |                                               | 332               | 30134      | 0.02         | Singlet-A | H-3->LUMO (15%), HOMO->L+2 (68%) |                                                   |           |                                   |
|  |  |                                               | 327               | 30609      | 0.0246       | Singlet-A | H-3->LUMO (36%), HOMO->L+3 (53%) |                                                   |           |                                   |
|  |  |                                               | <b>Chloroform</b> | 398        | 25127        | 0.1485    | Singlet-A                        | HOMO->LUMO (96%)                                  |           |                                   |
|  |  |                                               |                   | 334        | 29911        | 0.0606    | Singlet-A                        | H-3->LUMO (28%), HOMO->L+2 (56%)                  |           |                                   |
|  |  |                                               |                   | 329        | 30390        | 0.0308    | Singlet-A                        | HOMO->L+3 (76%) H-3->LUMO (9%)                    |           |                                   |
|  |  | <b>Complex 3<br/>-HN-Au...SiO<sub>2</sub></b> | <b>Water</b>      | 397        | 25213        | 0.1344    | Singlet-A                        | HOMO->LUMO (94%)                                  |           |                                   |
|  |  |                                               |                   | 332        | 30108        | 0.021     | Singlet-A                        | H-3->LUMO (14%), HOMO->L+1 (12%), HOMO->L+2 (26%) |           |                                   |
|  |  |                                               |                   | 328        | 30523        | 0.0277    | Singlet-A                        | H-3->LUMO (37%), HOMO->L+2 (21%), HOMO->L+3 (34%) |           |                                   |
|  |  |                                               | <b>DMSO</b>       | 399        | 25092        | 0.1428    | Singlet-A                        | HOMO->LUMO (94%)                                  |           |                                   |
|  |  |                                               |                   | 333        | 30045        | 0.0247    | Singlet-A                        | H-3->LUMO (13%), HOMO->L+1 (12%)                  |           |                                   |
|  |  |                                               |                   | 328        | 30452        | 0.0341    | Singlet-A                        | H-3->LUMO (34%), HOMO->L+2 (23%)                  |           |                                   |
|  |  |                                               | <b>Methanol</b>   | 396        | 25233        | 0.1338    | Singlet-A                        | HOMO->LUMO (93%)                                  |           |                                   |
|  |  |                                               |                   | 332        | 30104        | 0.0225    | Singlet-A                        | H-3->LUMO (15%), HOMO->L+1 (12%)                  |           |                                   |
|  |  |                                               |                   | 328        | 30503        | 0.0288    | Singlet-A                        | H-3->LUMO (34%), HOMO->L+2 (23%)                  |           |                                   |
|  |  |                                               | <b>Chloroform</b> | 398        | 25134        | 0.1442    | Singlet-A                        | HOMO->L+1 (95%)                                   |           |                                   |
|  |  |                                               |                   | 335        | 29874        | 0.0525    | Singlet-A                        | HOMO->L+1 (95%), HOMO->L+3 (28%)                  |           |                                   |
|  |  |                                               |                   | 329        | 30455        | 0.0339    | Singlet-A                        | H-3->LUMO (32%), HOMO->L+2 (27%)                  |           |                                   |
|  |  |                                               | <b>PA</b>         | <b>DFT</b> | <b>Water</b> | 253       | 39524                            | 0.0434                                            | Singlet-A | HOMO->L+1 (82%) H-3->LUMO (9%)    |
|  |  |                                               |                   |            |              | 244       | 41026                            | 0.3778                                            | Singlet-A | H-4->LUMO (24%), HOMO->LUMO (60%) |
|  |  |                                               |                   |            |              | 231       | 43206                            | 0.2403                                            | Singlet-A | H-4->LUMO (50%), H-4->L+2 (11%)   |

|  |              |                   |     |       |        |           |                                   |
|--|--------------|-------------------|-----|-------|--------|-----------|-----------------------------------|
|  |              | <b>DMSO</b>       | 253 | 39496 | 0.0462 | Singlet-A | HOMO->L+1 (82%) H-3->LUMO (9%)    |
|  |              |                   | 244 | 40956 | 0.393  | Singlet-A | H-4->LUMO (23%), HOMO->LUMO (61%) |
|  |              |                   | 232 | 43147 | 0.2392 | Singlet-A | H-4->LUMO (51%), H-4->L+2 (11%)   |
|  |              | <b>Methanol</b>   | 253 | 39534 | 0.0435 | Singlet-A | H-3->LUMO (10%), HOMO->L+1 (82%)  |
|  |              |                   | 244 | 41029 | 0.3594 | Singlet-A | H-4->LUMO (26%), HOMO->LUMO (58%) |
|  |              |                   | 232 | 43181 | 0.2562 | Singlet-A | H-4->LUMO (48%), H-4->L+2 (11%)   |
|  |              | <b>Chloroform</b> | 253 | 39563 | 0.0501 | Singlet-A | H-3->LUMO (11%), HOMO->L+1 (75%)  |
|  |              |                   | 245 | 40858 | 0.2403 | Singlet-A | H-4->LUMO (38%), H-4->L+2 (10%)   |
|  |              |                   | 233 | 43006 | 0.3818 | Singlet-A | H-4->LUMO (33%), HOMO->LUMO (51%) |
|  | <b>Expt.</b> |                   | 260 |       |        |           |                                   |

**Table S4.** Biological activity of PA as precited using PASS Online software



| Pa    | Pi    | Activity                        |
|-------|-------|---------------------------------|
| 0,891 | 0,003 | Cardiovascular analeptic        |
| 0,887 | 0,005 | Respiratory analeptic           |
| 0,886 | 0,004 | Superoxide dismutase inhibitor  |
| 0,882 | 0,009 | Phobic disorders treatment      |
| 0,835 | 0,004 | Proteasome ATPase inhibitor     |
| 0,818 | 0,005 | Analeptic                       |
| 0,813 | 0,002 | Octopamine antagonist           |
| 0,811 | 0,004 | Spasmolytic, urinary            |
| 0,811 | 0,011 | Taurine dehydrogenase inhibitor |
| 0,793 | 0,004 | Antihypoxic                     |

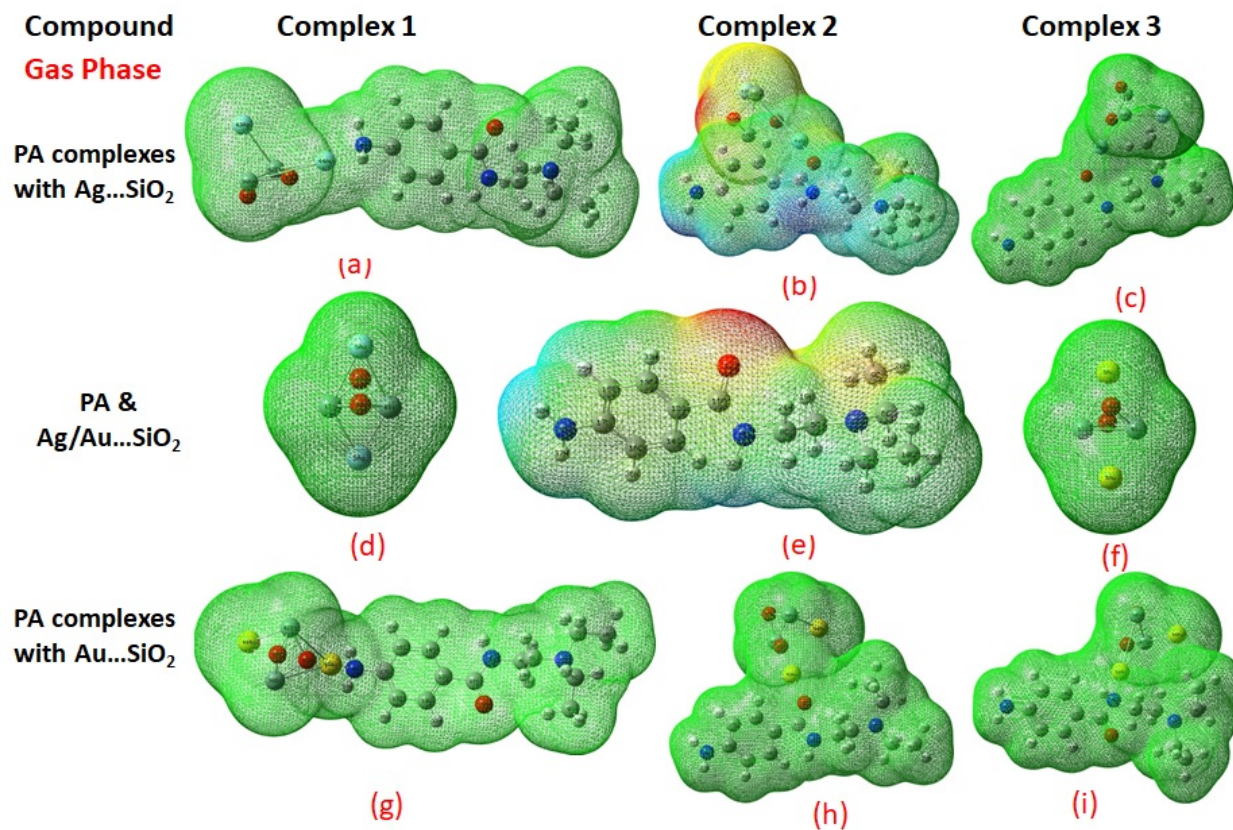

**Figure S1.** Molecular electrostatic potential (MEP) plots of PA drug with the Ag-SiO<sub>2</sub> (a-c) and Au-SiO<sub>2</sub> (g-i) complexes predicted in the gas medium. The corresponding MEPs of PA, Ag- and Au-SiO<sub>2</sub> substrates are also presented (d-f).

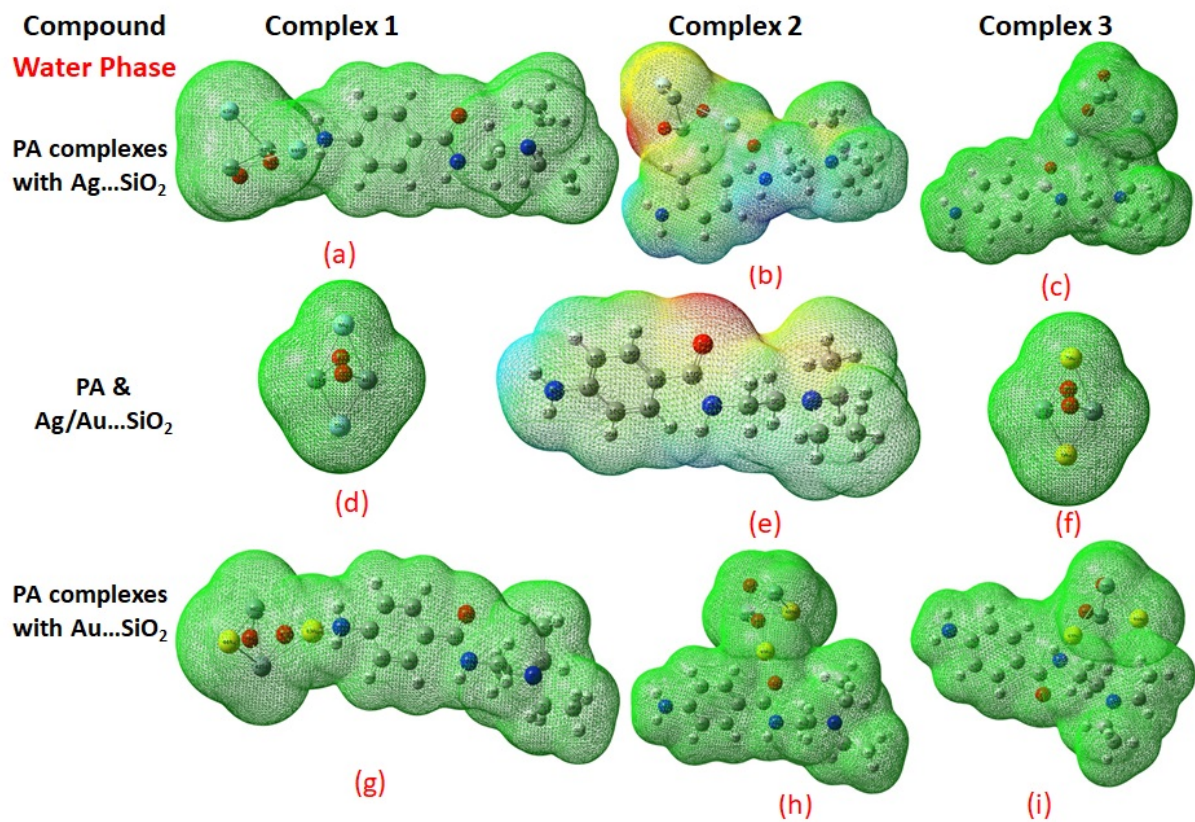

**Figure S2.** Molecular electrostatic potential (MEP) plots of PA drug with the Ag-SiO<sub>2</sub> (a-c) and Au-SiO<sub>2</sub> (g-i) complexes predicted in water medium. The MEPs of PA, Ag- and Au-SiO<sub>2</sub> substrates are also presented (d-f).

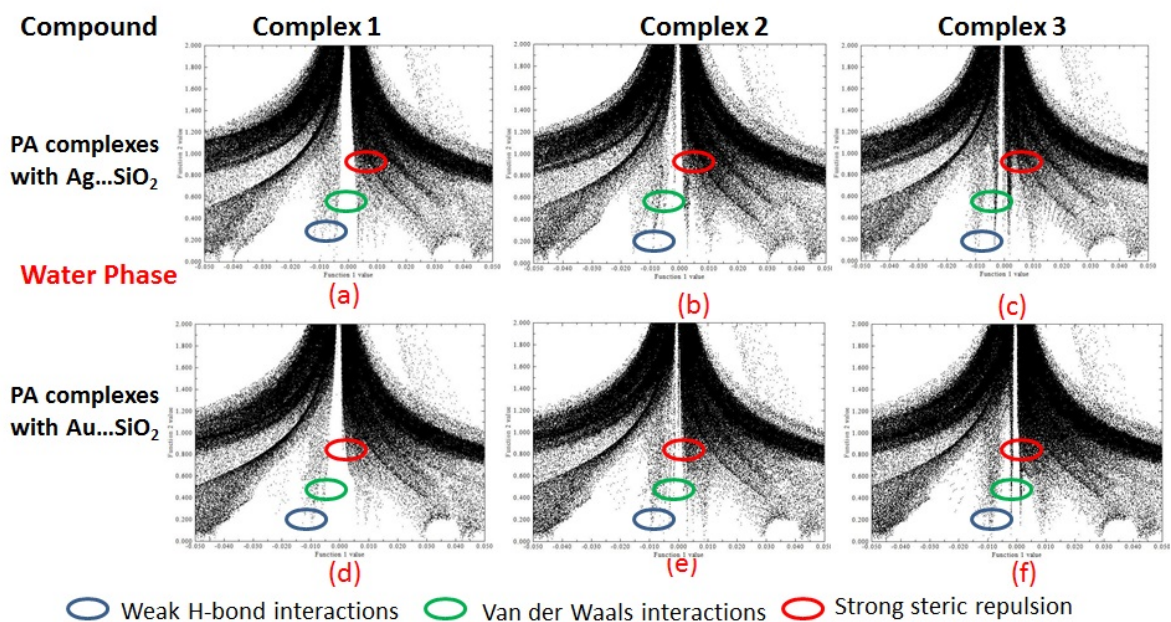

**Figure S3.** Reduced density gradient (RDG) scattered graphs PA $\cdots$ Ag-SiO<sub>2</sub> (a-c) and PA $\cdots$ Au-SiO<sub>2</sub> (d-f) complexes modeled in water medium. Different possible interaction modes are labeled.

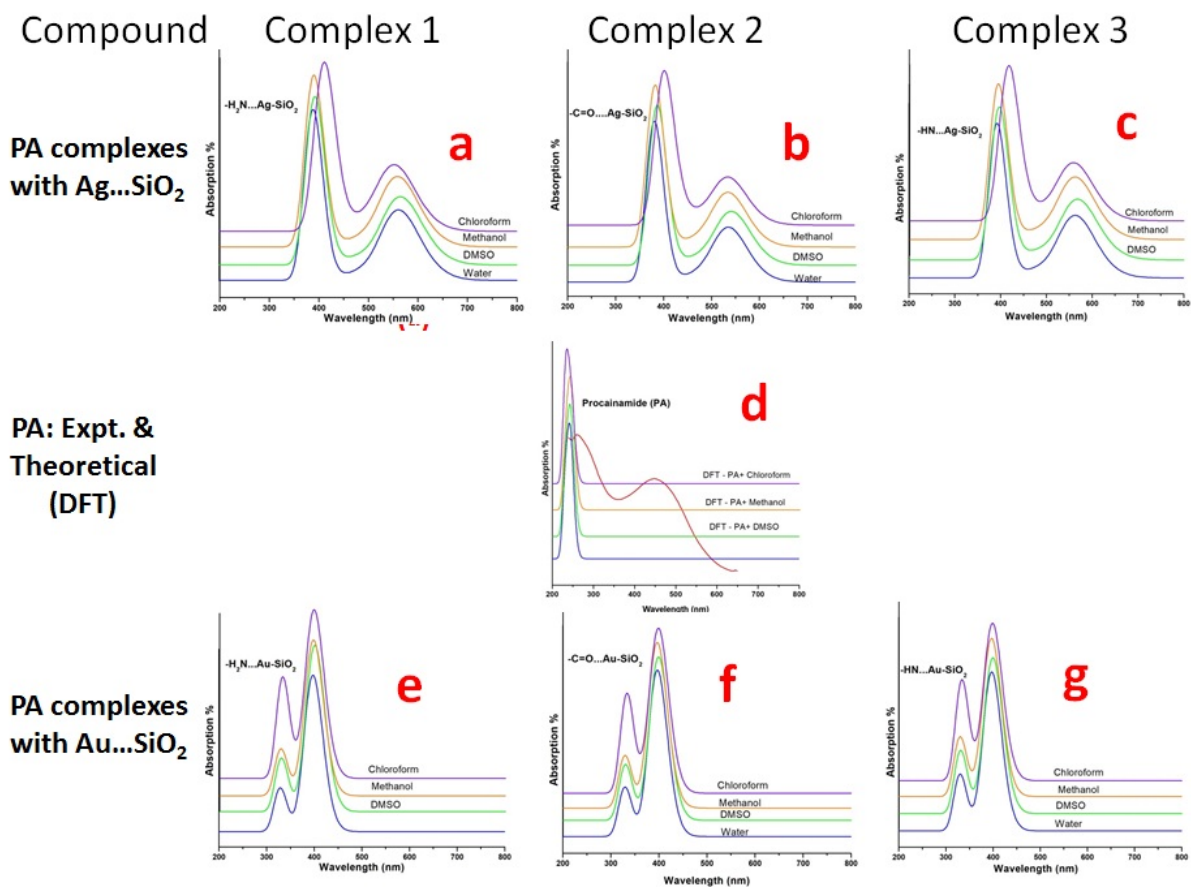

**Figure S4.** UV-Vis. Spectra of PA, compared with UV-Vis spectra of the PA+ Ag/Au-SiO<sub>2</sub> complexes investigated.
